# Supplementary material
Source: Springer Nature journal article supplement (https://www.springermedizin.de/resource/supplementary/12984_2009_224_MOESM6_ESM.pdf/9605562)
Supplement: MOESM6 [file 9605562]

**Influence of overlap on results of classification for VF vs rest, ANN**

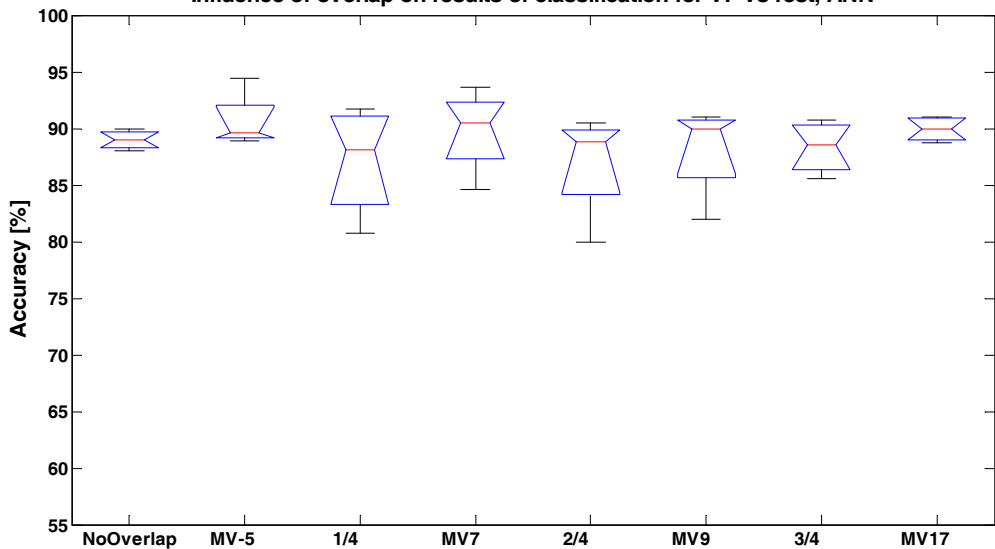

A

**Influence of overlap on results of classification for PROPRIO vs rest, SVM**

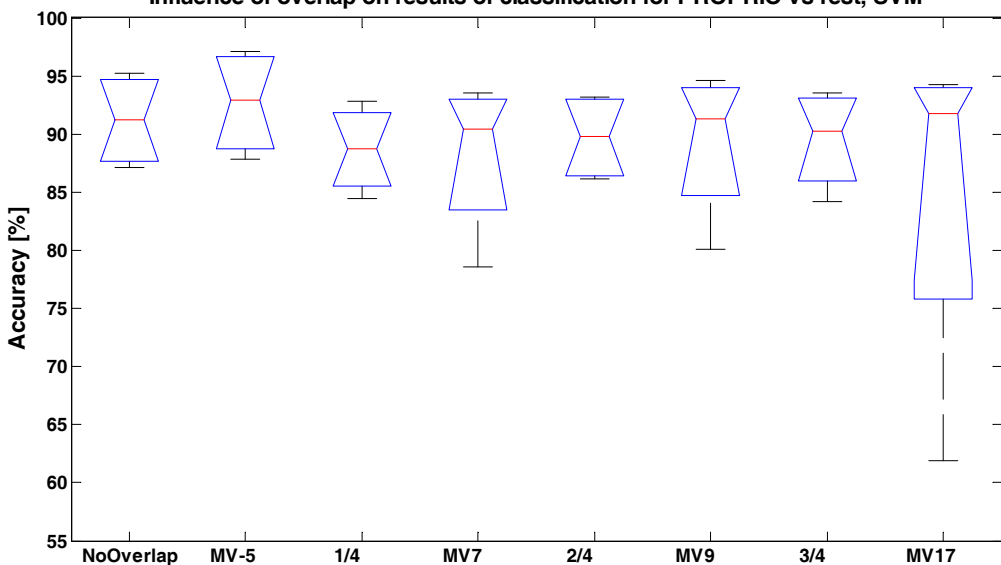

B

**Influence of overlap on results of classification for VF vs PROPRIO vs rest, SVM**

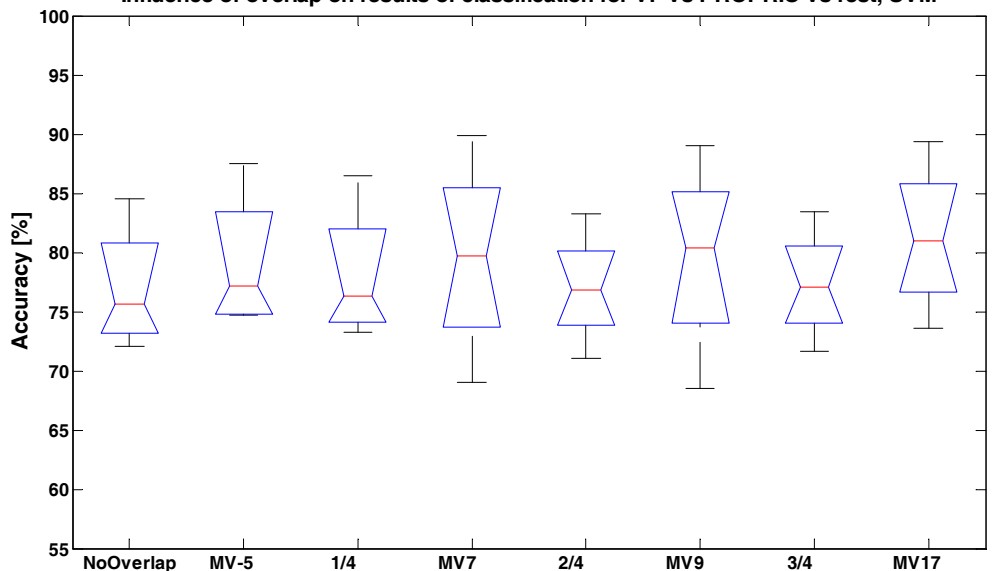

C
